# Supplementary material for: Independent Evaluation of Cell Culture Systems for Hepatitis E Virus
Source: MDPI journal article supplement (doi:10.3390/v14061254), 2022-06-09
Supplement: s1 [file s1]

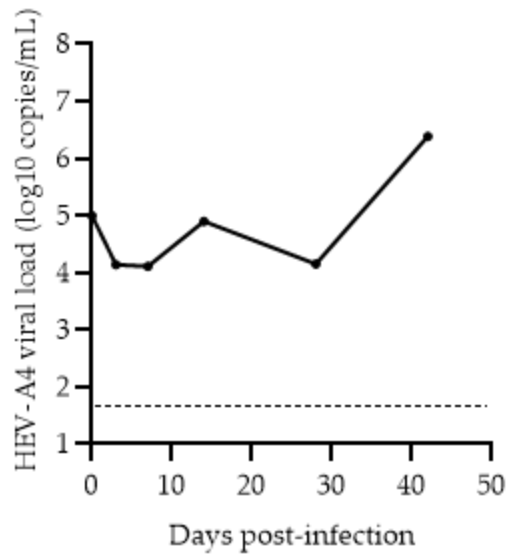

**Supplementary Figure S1.** Supernatant passage of hepatitis E virus (HEV) in PLC/PRF/5 cells maintained in MEM-D for HEV-A genotype 4 (HEV-A4). 0 dpi represents the viral load of the supernatant at infection. The limit of detection is denoted as the dashed line (50 copies per mL for HEV-A4).
